# Supplementary material for: Influence of Butorphanol, Buprenorphine and Levomethadone on Sedation Quality and Postoperative Analgesia in Horses Undergoing Cheek Tooth Extraction
Source: MDPI journal article supplement (doi:10.3390/vetsci9040174), 2022-04-06
Supplement: s1 [file s1]

## Supplemental material

**Table S1.** Sedation score (Assessment and adjustment of depth of sedation).

| Score              | Ataxia                                                                                       | Chewing on the mouth gag              | Headshaking                                               | Tongue activity                                               | Defense behaviors towards manipulation                                        |
|--------------------|----------------------------------------------------------------------------------------------|---------------------------------------|-----------------------------------------------------------|---------------------------------------------------------------|-------------------------------------------------------------------------------|
| 1                  | No ataxia                                                                                    | No chewing                            | No headshaking                                            | No activity                                                   | No defense behaviour                                                          |
| 2                  | Mild ataxia and swaying, occasionally laying against the stocks                              | Occasional chewing                    | Occasional headshaking                                    | Occasional tongue activity                                    | Mild defense behavior, no influence on extraction                             |
| 3                  | Moderate ataxia, constant leaning against the stocks, buckling of limbs                      | Continuously chewing                  | Continuously mild headshaking                             | Continuous mild tongue activity                               | Moderate defense behavior, mild influence on extraction                       |
| 4 <sup>a</sup>     | Severe ataxia, constant leaning against the stocks, permanent buckling of limbs <sup>b</sup> | Occasional severe chewing             | Occasional severe headshaking                             | Occasional severe tongue activity                             | Severe defense behavior, moderate influence on extraction                     |
| 5                  | Recumbency                                                                                   | Horse does not tolerate the mouth gag | Continuously severe headshaking, no manipulation possible | Continuously severe tongue activity, no manipulation possible | Manipulation not possible, horse does not tolerate instruments for extraction |
| <b>Total score</b> | 1-5                                                                                          | 1-5                                   | 1-5                                                       | 1-5                                                           | 1-5                                                                           |

<sup>a</sup> When one parameter was scored  $\geq 4$  an additional bolus of detomidine (3  $\mu\text{g}/\text{kg IV}$ ) was administered and the detomidine infusion rate was increased by 10  $\mu\text{g}/\text{kg/h}$ . <sup>b</sup> When ataxia was scored  $\geq 4$ , the infusion rate was decreased by 10  $\mu\text{g}/\text{kg/h}$ .
